# Supplementary material for: Improved influenza A whole-genome sequencing protocol
Source: PubMed Central journal article supplement (PMC11635996; doi:10.3389/fcimb.2024.1497278), 2024-11-28
Supplement: Image1.pdf [file Image1.pdf]

## Min Coverage Depth Per Each Segment

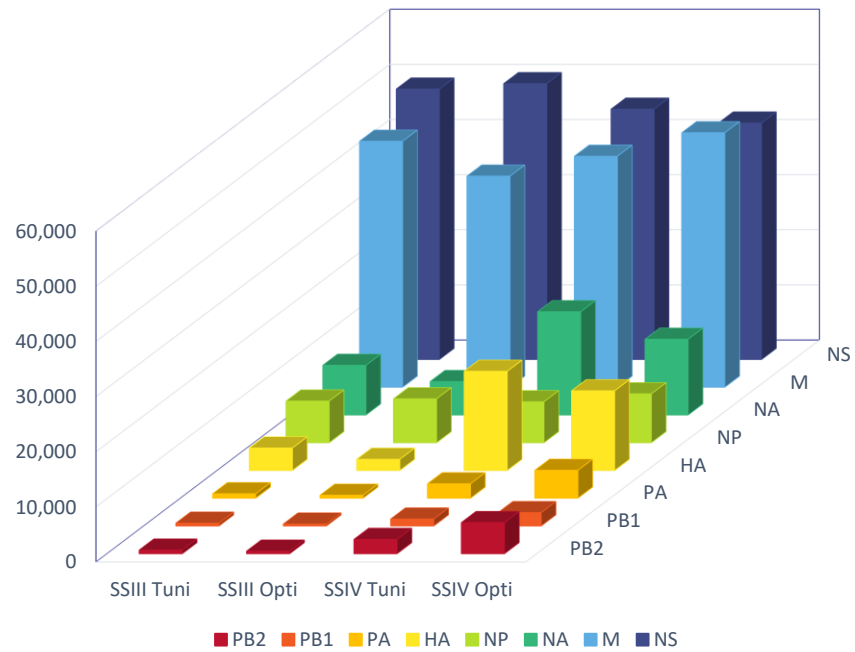

**Supplementary Figure 1.** Minimum read depth coverage per each segment for NGS libraries prepared using ONT-recommended SSIII and alternative SSIV RT-PCR kits with both Tuni and Opti primer sets.
