# Supplementary material for: Improved influenza A whole-genome sequencing protocol
Source: PubMed Central journal article supplement (PMC11635996; doi:10.3389/fcimb.2024.1497278), 2024-11-28
Supplement: Image2.pdf [file Image2.pdf]

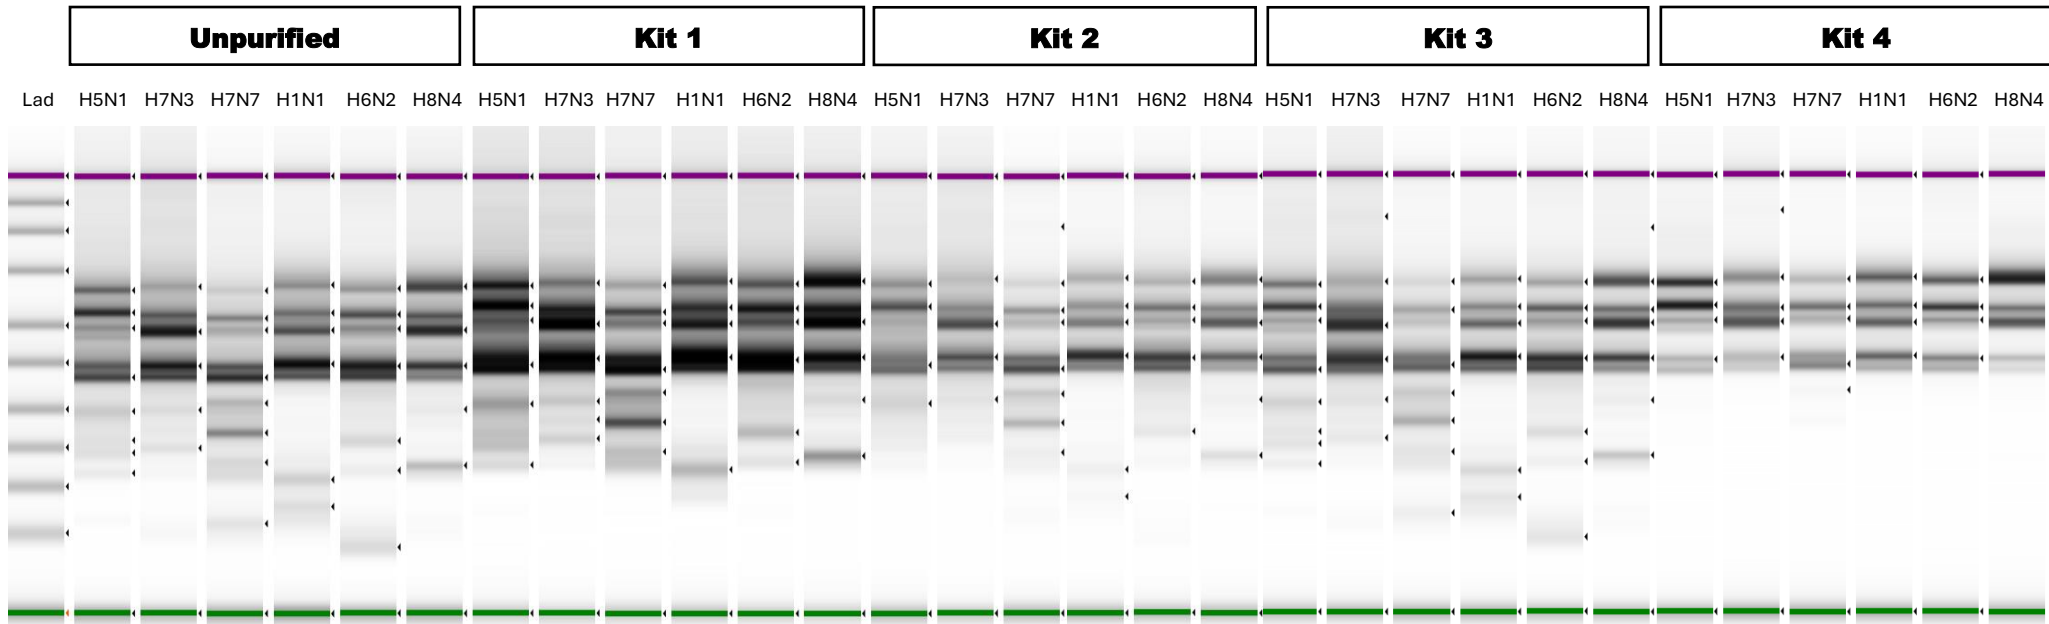

**Supplementary Figure 2.** TapeStation electropherogram of amplicons read length distribution purified with four different kits.
