# Supplementary material for: Improved influenza A whole-genome sequencing protocol
Source: PubMed Central journal article supplement (PMC11635996; doi:10.3389/fcimb.2024.1497278), 2024-11-28
Supplement: Image3.pdf [file Image3.pdf]

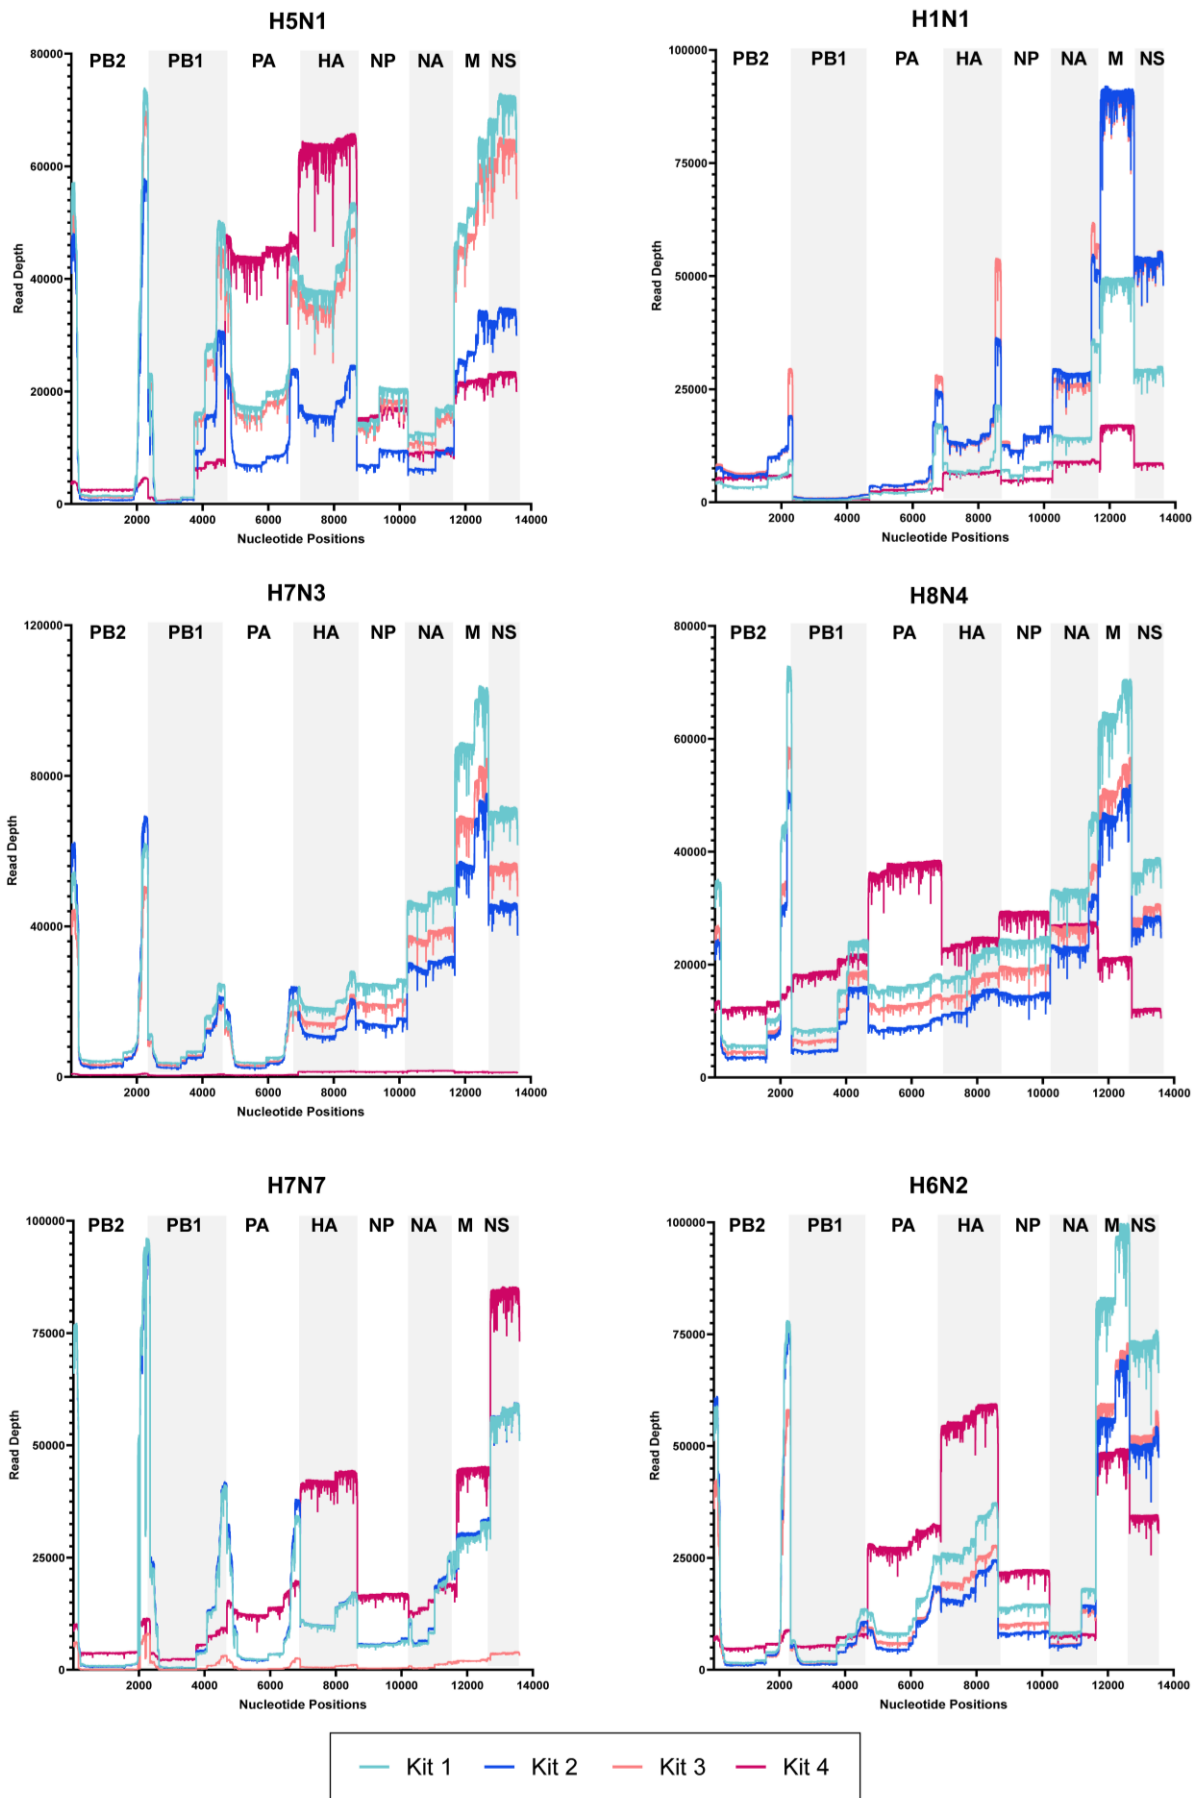

**Supplementary Figure 3.** Segment read depth coverage of influenza genomes (H5N1, H7N3, H7N7, H1N1, H5N3, and H6N2) purified with different kits. Sequencing reads obtained on the ONT platform were mapped to the reference genome *de novo* assembled from reads obtained on the Illumina platform.
