# Supplementary material for: Improved influenza A whole-genome sequencing protocol
Source: PubMed Central journal article supplement (PMC11635996; doi:10.3389/fcimb.2024.1497278), 2024-11-28
Supplement: Table1.pdf [file Table1.pdf]

**Supplementary Table 1.** Summary of RT-PCR thermocycling conditions, master mix, and primer sets used.

● **Primer Mix**

\*To prepare the **TUNI primer mix**, add primer stock solution so that there is 4: 1:5 ratio of Tuni12:Tuni12.4:Tuni13 primers. Sample calculation below:

| Name      | Sequence                              |
|-----------|---------------------------------------|
| Tuni 12   | ACG CGT GAT <u>CAG CAA AAG CAG G</u>  |
| Tuni 12.4 | ACG CGT GAT <u>CAG CGA AAG CAG G</u>  |
| Tuni 13   | ACG CGT GAT <u>CAG TAG AAA CAA GG</u> |

  

| Primer              | Volume        |
|---------------------|---------------|
| nuclease-free water | 90 µl         |
| Tuni 12 (100 µM)    | 4 µl          |
| Tuni 12.4 (100 µM)  | 1 µl          |
| Tuni 13 (100 µM)    | 5 µl          |
| <b>TOTAL</b>        | <b>100 µl</b> |

\*To prepare the **OPTI primer mix**, add primer stock solution so that there is 0.35: 0.65:1 ratio of Opti F1:F2:R primers. Sample calculation below:

| Name    | Sequence                              |
|---------|---------------------------------------|
| Opti F1 | GTT ACG CGC CAG <u>CAA AAG CAG G</u>  |
| Opti F2 | GTT ACG CGC CAG <u>CGA AAG CAG G</u>  |
| Opti R  | GTT ACG CGC <u>CAG TAG AAA CAA GG</u> |

  

| Primer              | Volume        |
|---------------------|---------------|
| nuclease-free water | 80 µl         |
| Opti F1 (100 µM)    | 3.5 µl        |
| Opti F2 (100 µM)    | 6.5 µl        |
| Opti R (100 µM)     | 10 µl         |
| <b>TOTAL</b>        | <b>100 µl</b> |

● **Thermocycling conditions**

| <b>SuperScript III Platinum with TUNI primers</b> |        |  |           |
|---------------------------------------------------|--------|--|-----------|
| 42°C                                              | 60 min |  |           |
| 94°C                                              | 2 min  |  |           |
| 94°C                                              | 30 sec |  | 5 cycles  |
| 45°C                                              | 30 sec |  |           |
| 68°C                                              | 3 min  |  |           |
| 94°C                                              | 30 sec |  | 31 cycles |
| 57°C                                              | 30 sec |  |           |
| 68°C                                              | 3 min  |  |           |
| 4°C                                               | hold   |  |           |

| <b>SuperScript III Platinum with OPTI primers</b> |         |  |           |
|---------------------------------------------------|---------|--|-----------|
| 55°C                                              | 2 min   |  |           |
| 42°C                                              | 90 min  |  |           |
| 94°C                                              | 2 min   |  |           |
| 94°C                                              | 15 sec  |  | 5 cycles  |
| 45°C                                              | 30 sec  |  |           |
| 68°C                                              | 3.5 min |  |           |
| 94°C                                              | 15 sec  |  | 30 cycles |
| 63°C                                              | 30 sec  |  |           |
| 68°C                                              | 3.5 min |  |           |
| 68°C                                              | 10 min  |  |           |
| 4°C                                               | hold    |  |           |

| <b>SuperScript IV with TUNI primers</b> |         |  |           |
|-----------------------------------------|---------|--|-----------|
| 55°C                                    | 2 min   |  |           |
| 42°C                                    | 90 min  |  |           |
| 98°C                                    | 2 min   |  |           |
| 98°C                                    | 10 sec  |  | 5 cycles  |
| 45°C                                    | 30 sec  |  |           |
| 72°C                                    | 3.5 min |  |           |
| 98°C                                    | 10 sec  |  | 30 cycles |
| 66°C                                    | 30 sec  |  |           |
| 72°C                                    | 3.5 min |  |           |
| 72°C                                    | 10 min  |  |           |
| 4°C                                     | hold    |  |           |

| <b>SuperScript IV with OPTI primers</b> |         |  |           |
|-----------------------------------------|---------|--|-----------|
| 55°C                                    | 2 min   |  |           |
| 42°C                                    | 90 min  |  |           |
| 98°C                                    | 2 min   |  |           |
| 98°C                                    | 10 sec  |  | 5 cycles  |
| 45°C                                    | 30 sec  |  |           |
| 72°C                                    | 3.5 min |  |           |
| 98°C                                    | 10 sec  |  | 30 cycles |
| 67°C                                    | 30 sec  |  |           |
| 72°C                                    | 3.5 min |  |           |
| 72°C                                    | 10 min  |  |           |
| 4°C                                     | hold    |  |           |
