# Supplementary material for: Improved influenza A whole-genome sequencing protocol
Source: PubMed Central journal article supplement (PMC11635996; doi:10.3389/fcimb.2024.1497278), 2024-11-28
Supplement: Table2.pdf [file Table2.pdf]

**Supplementary Table 2.** Summary statistics of four ONT sequencing runs from this study.

| <b>Run Description</b>  | <b>Library Amount, fmol</b> | <b>Available Pores</b> |              | <b>Sequenced Reads, M</b> | <b>Demultiplexed Reads, M</b> | <b>Influenza Reads, M</b> |
|-------------------------|-----------------------------|------------------------|--------------|---------------------------|-------------------------------|---------------------------|
|                         |                             | <b>before</b>          | <b>after</b> |                           |                               |                           |
| RT-PCR comparison       | 20                          | 1,630                  | 523          | 10.21                     | 7.51                          | 7.32                      |
| Primers comparison      | 60                          | 1,652                  | 1,081        | 9.42                      | 8.66                          | 7.26                      |
| Purification comparison | 60                          | 1,547                  | 876          | 8.61                      | 7.71                          | 6.30                      |
| Automation assessment   | 80                          | 1,623                  | 907          | 7.69                      | 4.80                          | 4.76                      |
